# The Secret World of Shrimps: Polarisation Vision at Its Best

Sonja Kleinlogel<sup>1,2\*</sup>, Andrew G. White<sup>3</sup>

**1** Department of Biophysical Chemistry, Max Planck Institute of Biophysics, Frankfurt am Main, Germany, **2** School of Biomedical Sciences, University of Queensland, Brisbane, Queensland, Australia, **3** Department of Physics and Centre for Quantum Computer Technology, University of Queensland, Brisbane, Queensland, Australia

## Abstract

**Background:** Animal vision spans a great range of complexity, with systems evolving to detect variations in light intensity, distribution, colour, and polarisation. Polarisation vision systems studied to date detect one to four channels of linear polarisation, combining them in opponent pairs to provide intensity-independent operation. Circular polarisation vision has never been seen, and is widely believed to play no part in animal vision.

**Methodology/Principal Findings:** Polarisation is fully measured via Stokes' parameters—obtained by combined linear and circular polarisation measurements. Optimal polarisation vision is the ability to see Stokes' parameters: here we show that the crustacean *Gonodactylus smithii* measures the exact components required.

**Conclusions/Significance:** This vision provides optimal contrast-enhancement and precise determination of polarisation with no confusion states or neutral points—significant advantages. Linear and circular polarisation each give partial information about the polarisation of light—but the combination of the two, as we will show here, results in optimal polarisation vision. We suggest that linear and circular polarisation vision not be regarded as different modalities, since both are necessary for optimal polarisation vision; their combination renders polarisation vision independent of strongly linearly or circularly polarised features in the animal's environment.

**Citation:** Kleinlogel S, White AG (2008) The Secret World of Shrimps: Polarisation Vision at Its Best. PLoS ONE 3(5): e2190. doi:10.1371/journal.pone.0002190

**Editor:** Andrew Iwaniuk, Smithsonian Institution, United States of America

**Received:** February 11, 2008; **Accepted:** March 31, 2008; **Published:** May 14, 2008

**Copyright:** © 2008 Kleinlogel, White. This is an open-access article distributed under the terms of the Creative Commons Attribution License, which permits unrestricted use, distribution, and reproduction in any medium, provided the original author and source are credited.

**Funding:** Australian Research Council Federation Fellow program; American Air Force; Swiss National Science Foundation

**Competing Interests:** The authors have declared that no competing interests exist.

\* E-mail: Sonja.Kleinlogel@mpibp-frankfurt.mpg.de

## Introduction

Polarisation is the plane of vibration of the electric field vector of light. In unpolarised light, the plane changes completely randomly with time; if the plane changes predictably with time, the light is said to be fully polarised. In nature the ambient—scattered and/or reflected—light tends to be partially-polarised, lying between these extremes. Fully polarised light ranges from *linear*, where the plane is constant with time, through elliptical to *circular*, where the plane rotates 360° every optical period (with respect to the propagation axis). Optimal polarisation vision is the ability to measure *all* aspects of polarisation in the visual field. In optics, the state of polarisation is plotted by a vector resting on the surface of, or in, a sphere called the Poincaré sphere, Figure 1. Vectors that rest on the surface of the sphere represent fully polarised light, shorter vectors represent partially-polarised light and the centre of the sphere represents unpolarised light. In rectangular coordinates, the vector position is given directly by Stokes' parameters [1–3], for example,

$$S_1 = \frac{I_h - I_v}{I_h + I_v}, S_2 = \frac{I_d - I_a}{I_d + I_a}, S_3 = \frac{I_r - I_l}{I_r + I_l} \quad (1)$$

where  $I$  is intensity;  $\{h, v, d, a\}$  represent horizontal, vertical, diagonal and anti-diagonal linearly polarised light;  $\{r, l\}$  represent right- and left-hand circularly polarised light; and Stokes'

parameters are normalised to unity for convenience. (The Stokes parameter for total light intensity,  $S_0$ , contains no information about the polarisation state and so we do not consider it here.) A common alternative is to describe the Stokes' vector in spherical coordinates: its length is the *degree* of polarisation,  $P$ , the angles  $\theta$  and  $\phi$  indicate the *type* of polarisation. In biological parlance, each of the above six polarisation components  $\{h, v, d, a, r, l\}$  is a separate channel: optimal polarisation vision requires measurement of all three Stokes' parameters, i.e. all six polarisation channels. Optimal polarisation vision confers obvious advantages to the possessor: detection of any change in the degree and type of polarisation—without needing assumptions about the polarisation background—even if the object causing that change is effectively invisible without the polarisation information.

Polarised light is abundant in nature. Visual backgrounds can be partially-polarised by scattering of natural light in the atmosphere or under water, or by reflection from natural surfaces such as the shiny cuticles of leaves or the air/water interface [4–7]. Background light can be polarised by biological surfaces, for example refraction from birefringent arthropod cuticles [8,9] or scattering from marine phytoplankton [10]; and by transmission, for example through the semi-transparent bodies of dinoflagellates [10]. Biological entities can also emit polarised light, for example fluorescent light emitted from chlorophyll [11], or the left and right lanterns of firefly larvae which emit left- and right-circularly polarised light [12].

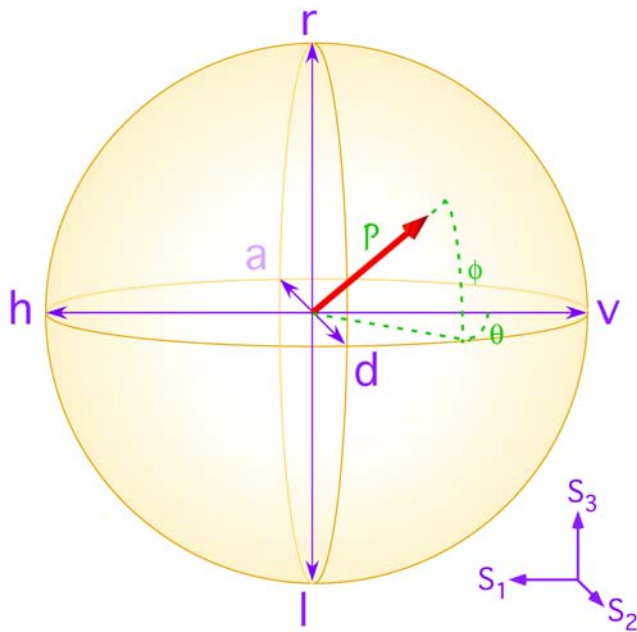

**Figure 1. Poincaré sphere.** Any polarisation state of light can be represented by a Stokes' vector, *red*, lying on (fully-polarised) or in (partially-polarised) the sphere. The cartesian co-ordinates of the vector are given by Stokes' parameters [1],  $\{S_1, S_2, S_3\}$ , *purple*; the end points of the axes are the horizontal/vertical  $\{h, v\}$ , diagonal/anti-diagonal  $\{d, a\}$  and right/left-circular  $\{r, l\}$ , polarised states, respectively. Alternatively, the vector can be represented in spherical co-ordinates by a length,  $P$ , and two angles,  $\theta$ ,  $\phi$ , *green*. The vector length is the degree of polarisation,  $P = \sqrt{S_1^2 + S_2^2 + S_3^2}$ ;  $\theta$  is the longitude, and  $\phi$  is the latitude. For linearly polarised light,  $\phi = 0^\circ$ ; for circularly polarised light,  $\phi = 90^\circ$ . doi:10.1371/journal.pone.0002190.g001

Linear polarisation sensitivity in arthropods and its biological implications have been studied intensely since the 1950s. A well known example is the use of the skylight polarisation pattern by arthropods for navigation and orientation [13]. Sensitivity to a single linear polarisation component increases contrast [6,14]; sensitivity to two or more linear polarisation components has been implicated in a range of visual functions including orientation [15], navigation [16,17], prey detection [18,19], predator avoidance [20] and intra-species signaling [21]. Biologists are aware that circularly polarised light is rare in nature, and a common conclusion is, to quote from the standard text on polarised light in animal vision [5]: "Thus, it is questionable whether circular/elliptical polarisation of light in nature could have any biological importance". Since optimal polarisation vision *requires* simultaneous measurement of linear *and* circular polarisation, as discussed above, there is a clear advantage in evolving the ability to detect both.

All crustaceans have the ability to sense linear polarisation over the whole compound eye, which is composed of several hundred visual units, the *ommatidia*. Each ommatidium consists of a cornea covering a lens, behind which lie eight photoreceptors, called *retinular cells*, clustered around a light guide, the *rhabdom*, Figure 2A. The first cell, centrally positioned around the light guide, is a small ultraviolet-sensitive retinular cell [22], R8. Under this are seven retinular cells, sensitive in the visible, that run the length of the light guide, R1–7 (Figure 2). The retinular cells extend parallel microvilli into the light guide: in R1–7 the microvilli alternate in orthogonal layers down the entire length of the light guide, between a group of three cells (group I = R1, R4, R5) and a group

of four cells (group II = R2, R3, R6, R7). The microvilli contain rhodopsin—a pigment molecule with a strong dipole moment—and are narrow tubes, ~60 nm in diameter, Figure 3C, aligning the rhodopsin so that the retinular cells act as linear polarisation sensors [5,23].

One group of crustaceans, the stomatopods, have evolved an equatorial mid-band in their eyes, Figure 3A,B. The resulting dorsal and ventral hemispheres (DH and VH) each sense linear polarisation, but rotated  $45^\circ$  with respect to each other; the mid-band, a section of between 2 and 6 rows of ommatidia, is specialised for colour, or polarisation, or both [24]. In particular, *Gonodactylus smithii* and other gonodactyloid stomatopod species possess six-rowed mid-bands, where the first four rows are specialised colour receptors (11 visual pigments [22,24], spanning 290 to 730 nm). In this paper we show by means of intracellular recordings that the two ventral mid-band rows 5 and 6 are specialised for detecting *circular* polarisation, the first reported circular polarisation sensitivity in any organism. We further show that stomatopods have both the anatomical and the neuronal features to measure all Stokes' parameters—essential for optimal polarisation vision.

## Results and Discussion

The structure of the rhabdoms in rows 5 and 6 is similar to that in the dorsal and ventral hemispheres with a few key differences: the R1–7 rhabdom is wider and more crystalline in appearance; the microvilli layers are thinner; and the ultraviolet sensitive cell on the top, R8, is structurally unusual. It is a four-lobed cell that surrounds the light guide; it is ovoid in transverse section and extends substantially further along the light guide than in the rest of the eye; and it is anisotropic, i.e. there is a preferred direction set by parallel microvilli extending between the lobes of the cell as shown in Figure 2D. The optical axis of the R8 cell (indicated by the microvilli orientation) is oriented at  $45^\circ$  to the detection axes of cells R1–7. Figure 2D shows the arrangement for row 5; row 6 maintains the same relative arrangement but the entire rhabdom is rotated by  $90^\circ$  (counter-clockwise when seen from front in right eye). It is these structural properties of the R8 cell that introduce a relative phase shift to orthogonal polarisations that pass through it. As we will show later, the R8 cells of rows 5 and 6 almost perfectly convert circularly polarised light to linearly polarised light, which is then detected by the alternating stacks of microvilli produced by R1–7. We hypothesize that the R8 cells have evolved to secondarily act as quarter-wave retarders in the visible, ~400–700 nm.

Of course, anatomical structure can only indicate possible function: we tested function directly using intracellular electrophysiology. The eye was mounted so that the lateral mid-band was aligned approximately to the horizontal. A sharp electrode was inserted through a hole cut into the dorsal cornea, then impaled into the photoreceptor under test. The receptors were illuminated with 50 ms flashes of light from a Xenon arc lamp passed through a UV cut-off filter, giving a test spectrum of ~400–700 nm. The spectral sensitivities were measured with unpolarised light: we used a spectral scan method where a photoreceptor is clamped to a pre-selected DC potential by adjusting the light flux as we scanned from 300 to 730 nm in 10 nm steps with a monochromator. Figure 4 shows the average spectral sensitivity for: *top* dorsal and ventral hemispheric photoreceptors; and *bottom* mid-band rows 5 and 6 photoreceptors. Note that the response for both is broad and very similar: the cells are near homochromatic in the visible. In both cases the photoreceptor response declines steeply above 600 nm; the significant difference between the spectra is the UV

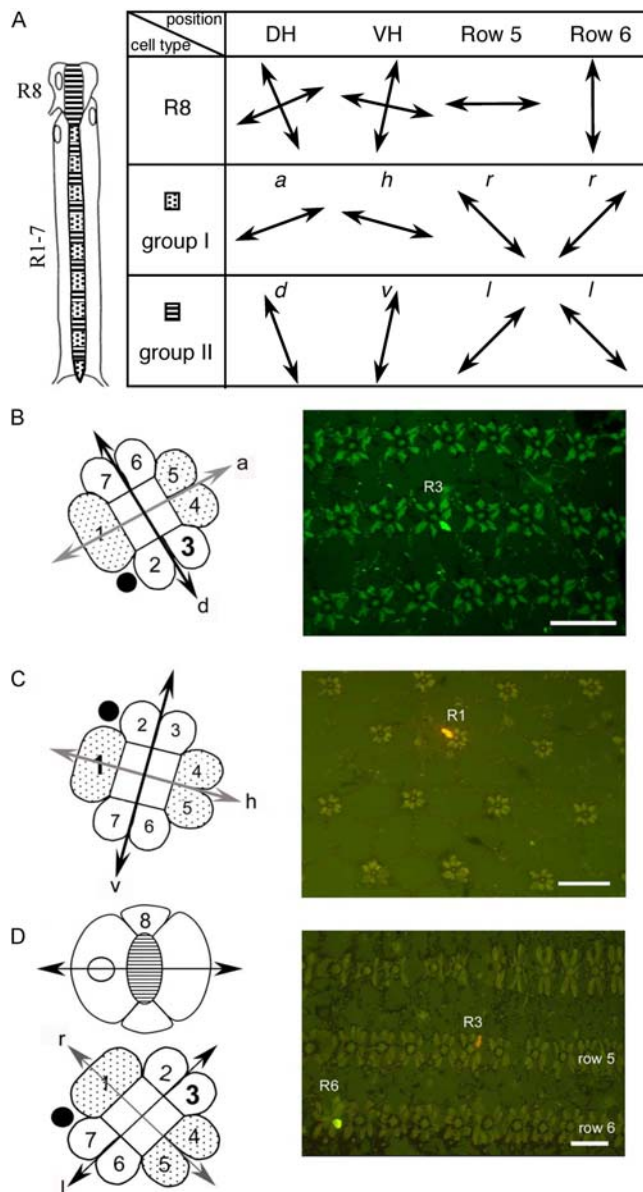

**Figure 2. Photoreceptor anatomy.** A) left. Diagram of a longitudinal section through an ommatidium (visual unit) in the hemispheres and mid-band rows 5 and 6 of the eye. The main rhabdom is formed by seven photoreceptors (R1–7), overlaid by a small, four-lobed ultraviolet sensitive photoreceptor, R8. right. The arrows indicate the microvillar directions within each retinal region as if looking into the eye (frontal view). The R1–7 cells are divided into group I cells (R1, R4, R5) and group II cells (R2, R3, R6, R7), which form layers of orthogonal microvilli throughout the rhabdom, see Figure 3C, and thus are sensitive to orthogonal polarisations. The overlying R8 cells in rows 5 and 6 are extraordinarily long and they produce parallel microvilli, whereas the R8 cells in the remainder of the retina produce microvilli that are both orthogonal and interdigitating (crossed arrows).  $\{r, l\}$  indicates sensitivity to right- and left-circularly polarised light,  $\{a, d, h, v\}$  indicates sensitivity to anti-diagonal, diagonal, horizontal and vertical linearly polarised light. All directions indicated in the text and subsequent figures refer to a frontal view of a right eye with the mid-band arranged horizontally. B)–D) Frontal diagrams of the R1–7 (numbered 1–7) cell body arrangement around the central light guide (rhabdom); and examples of dye-injected cells shown in the photomicrographs (scale bars 50  $\mu\text{m}$ ). B) The dorsal hemisphere, which analyses  $\{d, a\}$ , C) the ventral hemisphere, which analyses  $\{h, v\}$  and D), mid-band row 5, which analyses  $\{r, l\}$ . Group I reticular cells are stippled and group II reticular cells are plain. Bold numbers in the diagrams indicate the stained cell(s)

peak for the hemispheric cells. This may be due to: electrical coupling of R8 to the R1–7 cells in the hemispheric case [25]; suppressed UV response in the mid-band case due to absorption by the extraordinarily long mid-band R8 cells (22% of rhabdom); or a combination of the two.

The light was polarised with a combination of a linear polariser and a broadband quarter-wave plate, effective from 450–610 nm. Figure 4B shows the temporal response of the photoreceptors to the 50 ms flash of light, in this case for left- and right-circularly polarised light. The time curves are used to determine the peak responses, used in the remaining data analysis. Figures 4C,D show the raw angle-response data for the R1 photoreceptors (group I), respectively of the dorsal and ventral hemispheres (the dye-injected cell shown in Figure 2C). All angles are given relative to the  $0^\circ$  (vertical) position of the linear polarisation filter. The linear polarisation sensitivity was determined by stimulation with flashes of polarised light varied in angular steps of  $10^\circ$ . It is clear that the R1 receptors respond strongly to linearly polarised light: the minimum responses are non-zero since the photoreceptors are not perfect polarisation sensors, as we show below. Note that the dorsal receptor has a maximum response at  $60^\circ$ ; the ventral at  $105^\circ$ —reflecting the  $45^\circ$  difference in microvilli orientation. This of course is true for all group I receptors; for group II receptors the response will be moved by  $90^\circ$  (see supporting information Figure S2).

Figure 3B shows the resting position of the eye. The three dark areas are the so-called pseudo-pupils, indicating that light from the direction of the viewer is being strongly absorbed in those areas—that is, the three pseudo-pupils simultaneously share the visual field. The sharp electrode was inserted in approximately this region of the eye where the rows of ommatidia are inclined  $\sim 10$ – $20^\circ$ . The results for Figure 4C,D indicate that cells were recorded from ommatidia inclined at  $15^\circ$  to the horizontal. For convenience hereafter we will refer to  $105^\circ$  and  $15^\circ$  polarised light as horizontal and vertical  $\{h, v\}$  and  $150^\circ$  and  $60^\circ$  polarised light as diagonal and anti-diagonal  $\{d, a\}$ , respectively.

Photoreceptor responses are intensity-dependent, with a logarithmic response saturating at higher light intensities. The curves in Figure 4C,D are fitted logarithmic square cosines, see caption for details. We quantify the saturation by taking intensity-response data, Figure 4E,F, which plots the response (mV) vs. the relative light intensity,  $\log(I/I_0)$ . There are two lines of data: the upper are taken at the polariser angle corresponding to maximum response,  $\phi_{\max}$ , the lower at the angle for minimum,  $\phi_{\min}$ . There is a linear response region centred at the half-maximum: the

in the accompanying photomicrographs. Arrows indicate microvillar axes, and thus the directions of linearly polarised light to which the photoreceptors respond maximally ( $\phi_{\max}$ ). Grey and black arrows indicate group I and II receptors, respectively. The cell arrangement in mid-band row 6 (not shown) is rotated  $90^\circ$  counter-clockwise compared to row 5. Circular polarisation sensitivity is not innate to the R1–7 cells, but arises from the quarter-wave retardance of the overlying four-lobed R8 cell (D top). Quarter-wave retardance is realised by increased photoreceptor length and by the formation of unidirectional microvilli, the axis of which is indicated by the black arrow. The R8 microvilli are arranged at  $45^\circ$  to the underlying orthogonal microvillar sets formed by the R1–7 cells (D bottom): R8 converts circularly polarised to linearly polarised light at  $\pm 45^\circ$  to the R8 microvillar axis, depending on the handedness of the circular polarisation. Both dye-filled photoreceptors (row 5 R3 and row 6 R6) belong to group II receptors. The angle between the microvillar (optical) axes of the R8 cells and the microvillar directions of group II photoreceptors is  $-45^\circ$  in both mid-band rows 5 and 6. Both stained reticular cells are therefore more sensitive to  $l$ ; similarly the group I photoreceptors are more sensitive to  $r$ .  
doi:10.1371/journal.pone.0002190.g002

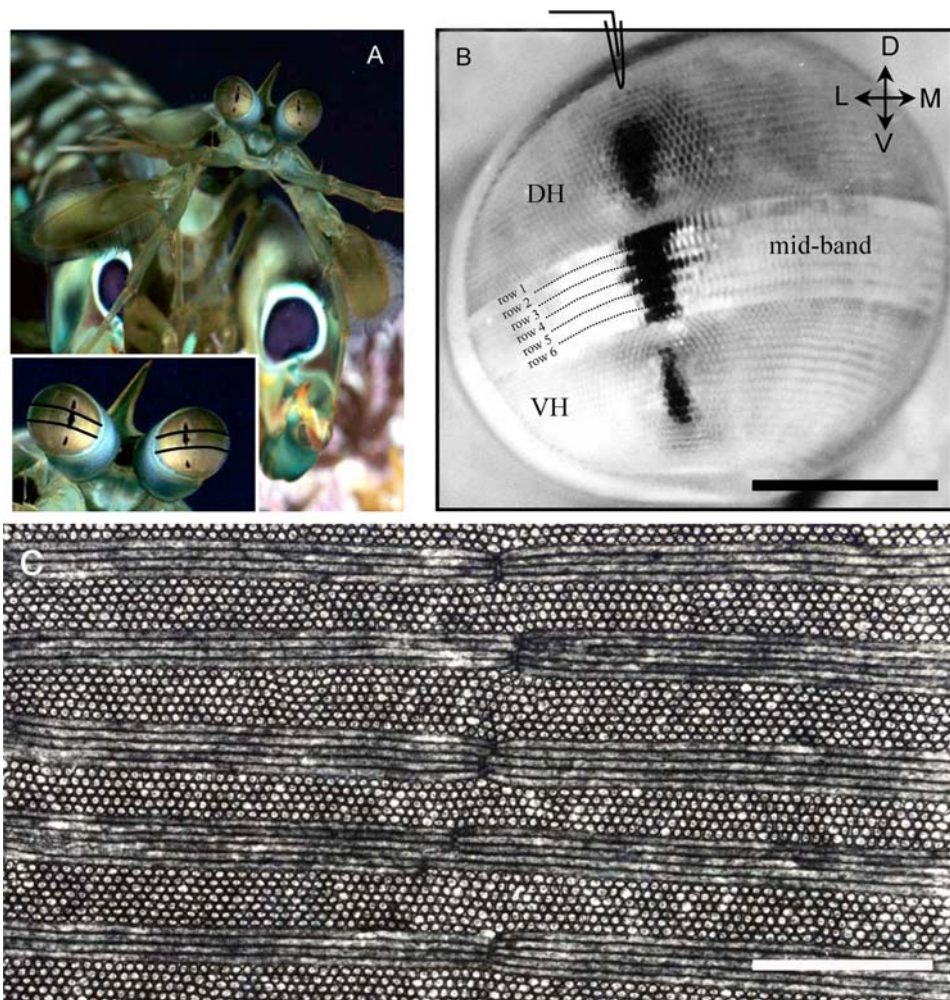

**Figure 3. The mantis shrimp's eye.** A) Adult *Gonodactylus smithii*, or mantis shrimp, ~7 cm long. The stalked apposition compound eyes are divided into a dorsal and a ventral hemisphere by an equatorial mid-band of enlarged and structurally specialised ommatidia. *Inset.* Mid-band position indicated by curved dark lines. The three pseudopupils (dark spots) visible within each eye indicate that the visual fields of the two hemispheres and the mid-band almost completely overlap at the equator of the eye, so that the three eye regions view the equatorial strip simultaneously. *Photograph by R.L. Caldwell.* B) Frontal view of the right eye to illustrate the division of the eye into a dorsal hemisphere (DH) and a ventral hemisphere (VH) by the equatorial mid-band formed by six rows of enlarged ommatidia, numbered row 1 to row 6 from dorsal to ventral. Mid-band rows 1–4 contain spectral photoreceptors; mid-band rows 5 and 6 are specialised for circular polarisation vision; the dorsal and ventral hemispheres for linear polarisation vision, as described in Figure 2A. Recording electrodes were lowered through corneal holes cut in the lateral half of the dorsal hemisphere, where the mid-band is  $\sim 15^\circ$  relative to the equator of the eye. The black scale bar is 1 mm, the axes refer to Dorsal, Medial, Ventral and Lateral. C) Electron micrograph of a longitudinal section through a mid-band row 6 rhabdom. The alternating layers of microvilli are highly ordered and in thinner layers than in hemispheric rhabdoms. The polarisation discrimination  $D$  of mid-band rows 5 and 6 retinular cells is twice as high as that of hemispheric cells due to a more crystalline microvillar structure: c.f.  $\bar{D}_{\text{mid}} = 0.340 \pm 0.061$  with  $\bar{D}_{\text{hemi}} = 0.145 \pm 0.035$  (Tables 1, S1 Supporting Information). The white scale bar indicates 1  $\mu\text{m}$ .  
doi:10.1371/journal.pone.0002190.g003

difference in relative intensity on a logarithmic scale,  $\delta_i$ , gives the polarisation sensitivity [23],  $10^{\delta_i}$ . The measured polarisation sensitivities are large,  $9.44 \pm 0.02$  and  $10.56 \pm 0.02$ , respectively for the dorsal and ventral R1 cells. These sensitivities are comparable to the high values of 7–12 measured in crabs [26] and crayfish [27].

Circular polarisation sensitivity was determined by stimulating photoreceptors in rows 5 and 6 with flashes of left- and right-circularly polarised light. Thus for example, Figure 4B shows the response for cell R3 in row 5, the stained cell in Figure 2D. The cell clearly responds more strongly to left- than right-circularly polarised light. Polarisation sensitivity was once again determined from intensity-response data, Figure 4G shows the circular polarisation sensitivity for a row 5 R1 cell,  $10.84 \pm 0.02$ ,

comparable with the linear polarisation sensitivities measured above. It is possible that this cell is sensitive in some degree to linearly polarised light, to check this we sent in diagonal and anti-diagonal linear polarisation, aligned with the microvilli of the R1–7 cells. Figure 4H shows the result—to within error there is zero linear polarisation sensitivity. This suggests that the R8 cell acts effectively as a quarter-wave retarder across the test spectrum, converting incoming circularly polarised light to linearly polarised light and vice versa.

We can determine the exact polarisation state that each cell is sensitive to using polarisation tomography [28], i.e. sending in the set of states  $\{h, v, d, a, r, l\}$ , measuring the response for each, and using these to calculate Stokes' parameters. Table 1 shows the results for R1 cells measured in the dorsal and ventral

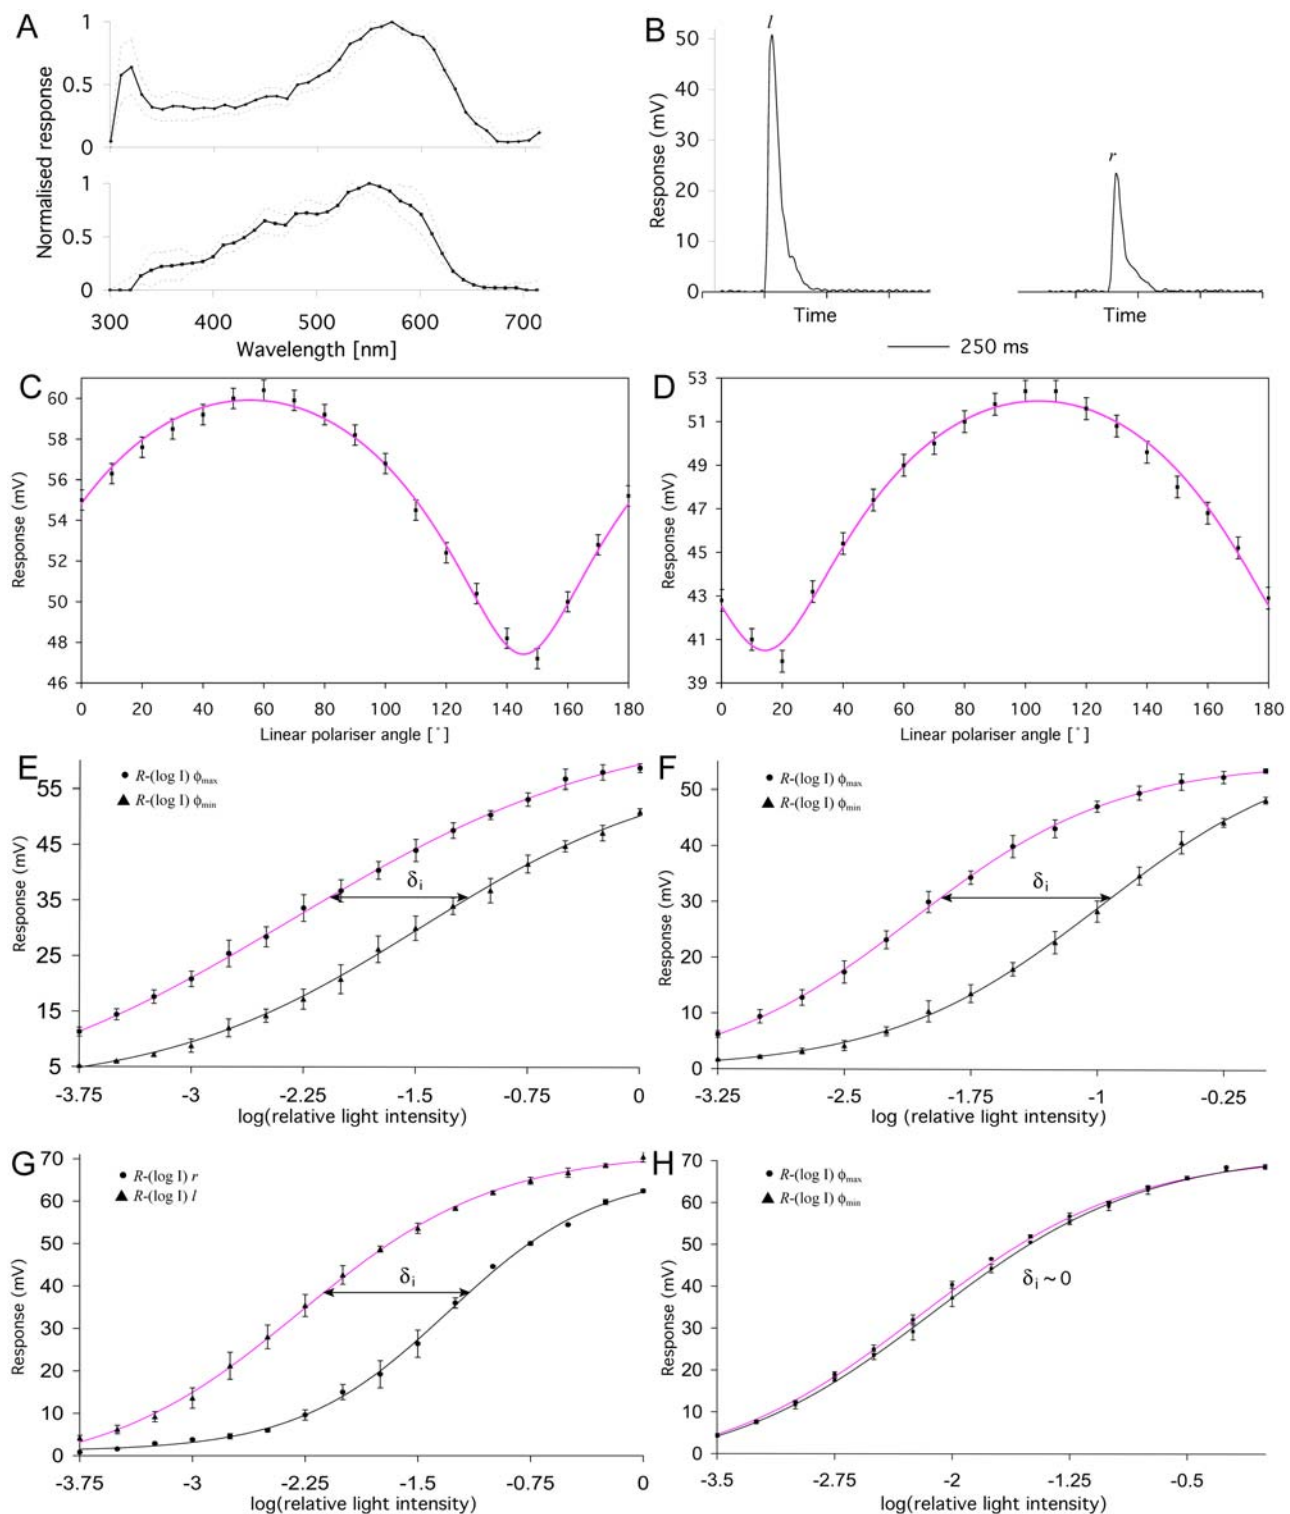

**Figure 4. Electrophysiological recordings from polarisation sensitive photoreceptors.** A) Normalised spectral responses averaged over: *top*) 12 hemispheric cells and *bottom*) 14 mid-band cells, rows 5 and 6. B) Response vs. time for a row 5 R3 photoreceptor when illuminated with a 50 ms spectrally-filtered light pulse: *left*) left-circular, *l*; *right*) right-circular, *r*, polarisation. This cell responds more strongly to *l*. C), D), Peak response vs. polariser angle for R1 cells in the C) dorsal and D) ventral hemispheres. These act as anti-diagonal and horizontal polarising photoreceptors, respectively. The smooth pink lines are logarithmic cosine-squared curves with 4 fit parameters (phase, cosine amplitude, response offset, and logarithmic amplitude). E), F), Peak response versus relative light intensity for the C) and D) cells. Top curves are measured at the maximum response angle,  $\phi_{\max}$ ; bottom at  $\phi_{\min}$ . The smooth lines are sigmoidal curves fitted to a Naka-Rushton function using least-squares approximation in Origin 6.1. The polarisation sensitivity,  $10^{\delta_i}$ , is measured by taking the difference between intensities in the linear part of the curves,  $\delta_i$ . G), H), Peak response versus relative light intensity for a row 5 R1 cell. G) Response to left (top curve) and right (bottom curve) circularly polarised light. H) Response to linearly polarised light  $\pm 45^\circ$  from the vertical—to within error there is zero linear polarisation sensitivity. doi:10.1371/journal.pone.0002190.g004

**Table 1.** Stokes' parameter responses for individual R1 cells measured in the dorsal and ventral hemispheres and row 5 of the mid-band.

|           | R1, Dorsal            | R1, Ventral         | R1, Row 5            |
|-----------|-----------------------|---------------------|----------------------|
| $S_1$     | $0.015 \pm 0.012$     | $0.196 \pm 0.015$   | $-0.024 \pm 0.011$   |
| $S_2$     | $-0.189 \pm 0.014$    | $0.012 \pm 0.014$   | $0.015 \pm 0.011$    |
| $S_3$     | $0.000 \pm 0.012$     | $0.012 \pm 0.014$   | $0.434 \pm 0.016$    |
| $P$       | $0.190 \pm 0.014$     | $0.196 \pm 0.026$   | $0.436 \pm 0.016$    |
| $\theta$  | $-85.5 \pm 3.6^\circ$ | $3.5 \pm 4.1^\circ$ | $-31 \pm 22^\circ$   |
| $\phi$    | $0.0 \pm 3.6^\circ$   | $3.6 \pm 4.0^\circ$ | $86.2 \pm 1.5^\circ$ |
| $D_{h,v}$ | $0.006 \pm 0.010$     | $0.992 \pm 0.012$   | $0.003 \pm 0.003$    |
| $D_{d,a}$ | $0.994 \pm 0.010$     | $0.004 \pm 0.009$   | $0.001 \pm 0.002$    |
| $D_{r,l}$ | $0.000 \pm 0.000$     | $0.004 \pm 0.009$   | $0.996 \pm 0.003$    |

The Stokes' parameters,  $\{S_1, S_2, S_3\}$ , are the rectangular coordinates of the Stokes' vector in the Poincaré sphere, see Figure 1 (unity radius for normalized Stokes' vectors). The length of the vector is the degree of polarisation,

$P = \sqrt{S_1^2 + S_2^2 + S_3^2}$ , the spherical coordinates  $\theta = \arctan(S_2/S_1)$  and

$\phi = \arcsin(S_3/P)$  indicate the type of polarisation. For linearly polarised light,  $\phi = 0^\circ$ ; for circularly polarised light  $\phi = 90^\circ$ . The R1 cells act as partially polarising detectors, with mid-band cells being better polarisers than hemispheric cells. The ability of each cell to distinguish along one of the Stokes' axes is given by the discrimination,  $D = (S_i/P)^2$ , where  $i \in \{1, 2, 3\}$ . Dorsal photoreceptor cells respond most strongly to diagonal/anti-diagonal linear polarisation; ventral photoreceptors to horizontal/vertical linear polarisation; and mid-band photoreceptors to right/left circular polarisation.

doi:10.1371/journal.pone.0002190.t001

hemispheres, and row 5 from the mid-band, Figures 4C–G. Respectively, each cell most strongly responds to diagonal, horizontal and right-circularly polarised light, as evidenced by the dominant  $S_2$ ,  $S_1$  and  $S_3$  parameters. It is also clear that the cells are acting as partial-polarising detectors: this is quantified by the degree of polarisation,  $P$ , which is 1 for a perfect polariser. Averaging over ten hemispheric reticular cells (dorsal and ventral, groups I & II) we find an average value of  $\bar{P}_{\text{hemi}} = 0.145 \pm 0.035$ ; for nine mid-band cells (rows 5 and 6, groups I & II) we find  $\bar{P}_{\text{mid}} = 0.340 \pm 0.061$  (full data in supporting information Table S1). We see that the mid-band cells give a much larger signal for totally polarised light than the hemispheric cells; this is consistent with the observations that the microvilli in the mid-band are more ordered and in thinner layers, Figure 3C, which is expected to reduce self-screening and give a better polarising response. Regardless of the strength of the response, a crucial ability is to preferentially distinguish just one of the Stokes' axes: this is measured by the discrimination,  $D = (S_i/P)^2$ , where  $i \in \{1, 2, 3\}$ . Our measurements show that the photoreceptor cells have near-perfect discrimination (Table 1). Within rows 5 and 6 the R1-7 cells preferentially distinguish the  $\{r, l\}$  Stokes' axis ( $D = 0.996 \pm 0.003$ ); they are almost blind to the  $\{h, v\}$  ( $D = 0.003 \pm 0.003$ ) and  $\{d, a\}$  ( $D = 0.001 \pm 0.002$ ) axes. This implies that the thickness of the R8 cell is consistent with that required for quarter-wave retardance; a quarter-wave phase shift is introduced to circularly polarised light when it passes through the R8 cell and the resulting linearly polarised light can then be detected by the R1-7 cells.

*Gonodactylus smithii* thus has all the requirements for optimal polarisation vision. Each eye possesses four linear  $\{h, v, d, a\}$  and two circular  $\{r, l\}$  polarisation input channels, which are homochromatic, Figure 4A, and acquire data simultaneously, since they share the same visual field, Figure 3B. There exists striking structural [23] and behavioural [29] evidence for opponent

circuitry between the orthogonal polarisation channels within the eyestalk. That is, the neural signal from one channel is subtracted from the other [30]. This is essential for Stokes' parameter analysis. Polarisation vision in stomatopods has mainly been implicated with intra-specific signal recognition, since many species reflect polarised light from their bodies [21]. However, the carapace of *Gonodactylus smithii* does not reflect linearly or circularly polarised light—polarisation vision in this species is clearly being used for something else. Stomatopods are shallow-water crustaceans in a visual environment with a partially polarised background [4,7]. Crustaceans are known to use polarisation for navigation; many stomatopod prey species are either reflective or transparent but change the polarisation of the light [18–20]—an obvious possible driver of evolutionary change. Optimal polarisation vision provides *all* the information about polarisation of the visual field without confusion states or neutral points [31]—giving the greatest ability to detect changes in both the *degree* and *type* of polarisation. This goes beyond simple contrast enhancement: optimal polarisation vision is analogous to the improvement afforded by stereo over mono vision in terms of increased information capacity.

Humanity began to use polarisation vision only recently—perhaps dating back to Viking use of Icelandic feldspar to navigate on cloudy days [32]—our move to optimal polarisation vision is significantly more recent, requiring three-basis camera systems and fast computer software. Once again, nature seems to have anticipated our best technological advances, with *Gonodactylus smithii* being the first organism described with the physiological and neurological components necessary for optimal polarisation vision. We feel it is worth reexamining other organisms for similar visual systems, and widening the use of machine-based optimal polarisation vision systems in both field and laboratory biology—so we too, can begin to see the world as shrimps do.

## Materials and Methods

### Animals and preparation

Adult male and female stomatopods of the species *Gonodactylus smithii* (Crustacea, Hoplocarida, Stomatopoda, Gonodactyloidea) were collected with hand-nets from reef flats on Lizard Island (Queensland, Australia, GBRMPA permit # G06/15528.1) and were maintained under a 12h:12h dark/light cycle in marine aquaria approved by AQIS (Australian Quarantine Inspection Service) and Environment Australia Wildlife Protection. Animals were anaesthetized by cooling before the eyes were removed and the animal euthanized by decapitation. All procedures were approved by the Animal Ethics Committee (UAEC, permit # VTHRC/488/06) of the University of Queensland.

The amputated eye was mounted on a plastic rod with the lateral mid-band region oriented horizontally and immersed in oxygenated stomatopod saline (Figure S1 supporting information). The preparation was placed at the centre of a cardan arm arrangement carrying the end of a liquid light guide supplying a  $0.9^\circ$  light stimulus, produced by a 150 W Xenon-arc lamp (Oriel, Stratford, USA) in combination with a computer-controlled monochromator (Oriel, Stratford, USA). At the location of the eye the white light had an unattenuated maximal intensity of approximately  $10^{18}$  photons  $s^{-1} cm^{-2}$ , which could be adjusted with a computer-controlled neutral density wedge (0–4 on a relative logarithmic scale, Edmund Optics).

### Electrophysiology

Microelectrodes either filled with 1% ethidium bromide (Sigma-Aldrich, St. Louis, MO, USA) in 1 M KCl (40–100 M $\Omega$ ) or 5%

Lucifer Yellow CH (Sigma-Aldrich Pty Ltd, Castle Hill, NSW, Australia) in 0.1 M Tris buffer and 1 M LiCl (100–250 M $\Omega$ ) were lowered vertically into the retina through a corneal hole cut with a razorblade in the lateral dorsal hemisphere (Figure S1 supporting information). The pipette was connected to the headstage of an intracellular amplifier (Axoprobe 1A, Axon Instruments Ltd, Inverurie, Scotland) *via* a chloride silver electrode and an Ag/AgCl pellet immersed in saline served as ground electrode. Single photoreceptor responses were digitized on a virtual oscilloscope (ADC-100) using Pico Scope software (Pico Technology, Camperdown, NSW, Australia) and then exported into Microsoft Excel for analysis.

After impalement of a photoreceptor and approximate alignment of the light source with its optical axis, the receptor was characterized by its spectral sensitivity, which was measured with the spectral scan method [33]. In order to determine the linear polarisation sensitivity of the cell a UV-transmitting linear polarisation filter (HNBP, Polaroid Company) was inserted between the liquid light guide and the eye and its angle relative to the eye changed in angular steps of 10° (0° is vertical polarisation) whilst the eye was stimulated with brief (50 msec) flashes of light at 5 sec intervals. Two intensity-response R-(log I) functions were then recorded by applying 0.25 log intensity series of light-flashes at the two polariser angles which elicited maximal ( $\phi_{\max}$ ) and minimal ( $\phi_{\min}$ ) photoreceptor response respectively. In order to deliver sufficient light to the photoreceptor—yet eliminating responses from the potentially electrically coupled overlying R8 cells—we used white light in combination with a 400 nm long-pass filter (1¼” UV/IR-Cut-Filter, Baader Planetarium, Mammendorf, Germany, transmission 400–700 nm) for stimulation.

To assess the circular polarisation sensitivity of the cell, an achromatic quarter wave retarder plate characterized by a practically constant absorption spectrum for wavelengths from 450< $\lambda$ <610 nm (Edmund Optics, Singapore) was inserted between the linear polarisation filter and the eye. To produce right- and left-handed circularly polarised light, the optical axis of the wave plate was oriented at  $-45^\circ$  or  $+45^\circ$  relative to the optical axis of the linear polarisation filter. Two R-(log I) functions were then recorded using flashes of left-handed and right-handed circularly polarised light respectively. At the end of each recording, cells were iontophoretically marked with either Lucifer yellow CH using a 0.8 to 1 nA hyperpolarising DC current at 1 Hz for 4 to 5.5 min or with ethidium bromide using a 0.6 to 1 nA depolarising DC current at 1 Hz for 3.5 to 4 min. Data sets were only accepted if there was no appreciable change in  $\phi_{\max}$  or resting membrane voltage during the set of runs. Polarisation responses computed were always above threshold and below saturation. Responses to  $\{h, v, d, a\}$  for Stokes' parameters were always measured in the linear response part of the R-(log I) curves. Only approximately parallel R-(log I) curves were used for analysis, since the principle of univariance applies [34].

## References

1. Stokes G (1852) On the composition and resolution of streams of polarized light from different sources. *Trans Camb Phil Soc* 9: 399.
2. Hecht E, ed (2001) *Optics*. 4 ed Addison Wesley. pp 680.
3. Born M, Wolf E, eds (1999) *Principles of Optics: Electromagnetic Theory of Propagation, Interference and Diffraction of Light*. 7 (expanded) ed Cambridge University Press. pp 952.
4. Ivanoff A, Waterman TH (1958) Elliptical polarization of submarine illumination. *J Mar Res* 16: 255–282.
5. Horváth G, Varjú D (2003) *Polarized light in animal vision*. Berlin, Heidelberg, New York: Springer.
6. Wehner R (2001) Polarization vision - a uniform sensory capacity? *J Exp Biol* 204: 2589–2596.
7. Cronin TW, Shashar N (2001) The linearly polarized light field in clear, tropical marine waters: spatial and temporal variation of light intensity, degree of polarization and e-vector angle. *J Exp Biol* 204: 2461–2467.
8. Neville AC, Luke BM (1971) From optical activity in crustacean cuticle. *J Insect Physiol* 17: 519–526.
9. Horváth G, Hegedűs R, Szél G (2006) Imaging polarimetry of the circularly polarizing cuticle of scarab beetles (Coleoptera: Rutelidae, Cetoniidae). *Vis Res* 46: 2786–2797.
10. Shapiro D, Hunt A, Quinby-Hunt M, Hull P (1991) Circular polarization effects in the light scattering from single and suspensions of dinoflagellates. In: Spinrad R ed. *Underwater imaging, photography, and visibility*. Bellingham, Washington: SPIE 1991. pp 30–41.
11. Gafni A, Hardt J (1975) Circular polarization of fluorescence of chlorophyll in solution and in native structures. *Biochim Biophys Acta* 387: 256–264.
12. Wynberg H, Meijer E, Hummelen J, Dekkers H, Schippers P, et al. (1980) Circular polarization observed in bioluminescence. *Nature* 286: 641–642.
13. Wehner R, Lanfranconi B (1981) What do the ants know about the rotation of the sky? *Nature* 293: 731–733.

## Histology

Eyes were fixed in 4% paraformaldehyde and embedded in 2-hydroxyethylmethacrylate (Technovit T7100, Heraeus, Germany). Serial frontal plastic sections of 7  $\mu$ m thickness were viewed under a Zeiss Axioscope microscope (10 $\times$ /0.30 and 20 $\times$ /0.5 objectives) equipped with a digital SPOT camera (Diagnostic Instruments, Sterling Heights, MI, USA) using fluorescent microscopy and ALPHA Vivid standard Lucifer yellow XF14 filters (Omega Optical, Inc., Brattleboro, VT, USA). Images were processed and enhanced in contrast using Adobe Photoshop 7.0 (Adobe Systems).

## Terminology

To simplify the description of the eyes' anatomy, in particular the direction of microvilli to the outside world and the directions of maximal linear polarisation sensitivities ( $\phi_{\max}$ ) of individual photoreceptors, the text and all figures describe the directions as seen in a frontal view of a right eye with the mid-band arranged horizontally. In a left eye, the photoreceptor arrangement, microvillar orientations and  $\phi_{\max}$  will be mirror-symmetric.

## Supporting Information

### Table S1 Overview of recordings

Found at: doi:10.1371/journal.pone.0002190.s001 (0.11 MB DOC)

**Figure S1** Preparation for electrophysiological recordings. The isolated eye was mounted on a plastic rod and placed into a glass-bubble filled with stomatopod saline so that the lateral mid-band was oriented horizontally. The intracellular electrode was lowered vertically through a small hole cut into the lateral cornea of the dorsal hemisphere. After Kleinlogel and Marshall (2006).

Found at: doi:10.1371/journal.pone.0002190.s002 (0.73 MB TIF)

**Figure S2** Peak response vs. polariser angle for A) the R3 cell in the dorsal and B) the R7 cell in the ventral hemispheres, respectively. These group II cells act as diagonal and vertical polarising photoreceptors, respectively, sensitive to the orthogonal polarisations of the group I cells shown in Figures 4C,D of the main text.

Found at: doi:10.1371/journal.pone.0002190.s003 (6.24 MB TIF)

## Acknowledgments

We acknowledge valuable discussions with Thomas Labhart, Alexei Gilchrist and Michael Harvey. Justin Marshall and David Vaney provided help with the electrophysiological apparatus.

## Author Contributions

Conceived and designed the experiments: SK AW. Performed the experiments: SK. Analyzed the data: SK AW. Contributed reagents/materials/analysis tools: AW. Wrote the paper: SK AW.

14. Schechner Y, Karpel N (2004) Clear underwater vision. *Proc Computer Vision & Pattern Recognition* 1: 536–543.
15. Waterman TH (1988) Polarization of marine light fields and animal orientation. *SPIE* 925: 431–437.
16. Goddard SM, Forward RB (1991) The role of the underwater polarized light pattern, in sun compass navigation of the grass shrimp, *Palaemonetes vulgaris*. *J Comp Physiol A* 169: 479–491.
17. Schwind R (1999) *Daphnia pulex* swims towards the most strongly polarized light - A response that leads to 'shore flight'. *J Exp Biol* 202: 3631–3635.
18. Shashar N, Hanlon R, Petz Ad (1998) Polarization vision helps detect transparent prey. *Nature* 393: 222–223.
19. Sabbah S, Shashar N (2005) Polarization contrast of zooplankton: A model for polarization-based sighting distance. *Vision Res* 46: 444–456.
20. Shashar N, Hagan R, Boal J, Hanlon R (2000) Cuttlefish use polarization sensitivity in predation on silvery fish. *Vision Res*. pp 71–75.
21. Cronin TW, Shashar RL, Caldwell RL, Marshall N, Cheroske AG, et al. (2003) Polarization vision and its role in biological signaling. *Integr Comp Biol* 43: 549–558.
22. Marshall NJ, Oberwinkler J (1999) The colourful world of the mantis shrimp. *Nature* 401: 873–874.
23. Kleinlogel S, Marshall N (2006) Electrophysiological evidence for linear polarization sensitivity in the compound eyes of the stomatopod crustacean *Gonodactylus chiragra*. *J Exp Biol* 209: 4262–4272.
24. Marshall NJ (1988) A unique colour and polarization vision system in mantis shrimps. *Nature* 333: 557–560.
25. Kleinlogel S, Marshall N (2005) Photoreceptor projection and termination pattern in the lamina of gonodactyloid stomatopods (mantis shrimp). *Cell Tissue Res* 321: 273–284.
26. Shaw SR (1966) Polarized light responses from crab retinula cells. *Nature* 211: 92–93.
27. Waterman TH, Fernandez HR (1970) E-Vector and wavelength discrimination by reticular cells of the crayfish *Procambarus*. *Z Vergl Physiol* 68: 154–174.
28. James D, Kwiat P, Munro W, White A (2001) Measurement of qubits. *Phys Rev A*. pp 052312.
29. Marshall NJ, Cronin TW, Shashar N, Land M (1999) Behavioural evidence for polarisation vision in stomatopods reveals a potential channel for communication. *Curr Biol* 9: 755–758.
30. Glantz MR (2001) Polarization analysis in the crayfish visual system. *J Exp Biol* 204: 2383–2390.
31. Bernard GD, Wehner R (1977) Functional similarities between polarization vision and color vision. *Vision Res* 17: 1019–1028.
32. Hegedüs R, Åkesson S, Wehner R, Horváth G (2007) Could Vikings have navigated under foggy and cloudy conditions by skylight polarization? On the atmospheric optical prerequisites of polarimetric Viking navigation under foggy and cloudy skies. *Proc Roy Soc A* 463: 1081–1095.
33. Menzel R, Ventura DF, Hertel H, de Souza JM, Greggers U (1986) Spectral sensitivity of photoreceptors in insect compound eyes: Comparison of species and methods. *J Comp Physiol A* 158: 165–177.
34. Laughlin SB (1975) Receptor function in the apposition eye - an electrophysiological approach. In: Snyder AW, Menzel R, eds. *Photoreceptor optics*. Berlin, Heidelberg, New York: Springer-Verlag 1975. pp 479–498.
